# Supplementary material
Source: publisher figshare collection journal article supplement (https://karger.figshare.com/articles/dataset/_/4249922)
Supplement: Supplementary file 1 [file 1]

**Supplementary video legends**

**Supplementary video 1.** D1 single bending.

A single event of single bending by a D1 animal, recorded at 600fps (plays at 15 fps).

**Supplementary video 2.** D1 alternating bending.

A single event of alternating bending by a D1 animal, recorded at 600fps (plays at 15 fps).

**Supplementary video 3.** D1 nodding.

One full cycle of nodding by a D1 animal, recorded at 600fps. Only every second frame is displayed in this video (plays at 15 fps).

**Supplementary video 4.** D1 swimming.

Two full cycles of swimming by a D1 animal, recorded at 600 fps (plays at 15 fps).

**Supplementary video 5.** D3 filtering.

One full cycle of filtering by a D3 animal, recorded at 400fps (plays at 15 fps). The house is not visible in this recording. Note that the appearance of the animal in this video is different from the others. This is primarily because the contrast is lower and the animal is not seen directly from the side, such that the the tail fin is visible. In addition, the animal outline has been artificially enhanced by masking the background.

**Supplementary video 6.** 4H single bending.

Two full cycles of single bending in a newly hatched 4H animal, recorded at 400fps (plays at 15 fps), showing that bending is cyclical at this age.

**Supplementary video 7.** 4H swimming.

One full cycle of swimming by a newly hatched 4H animal, recorded at 400fps (plays at 15 fps).

**Supplementary video 8.** D3 animal entering house.

A D3 animal entering a new house, recorded at 700fps. Only every forth frame is shown in this video (plays at 15 fps). The video first shows a cycle of nodding, followed by the house entering behavior, and ends with the first of several cycles of filtering used to complete house inflation. The house is not visible in this recording.

**Supplementary video 9.** D5 animal exiting house.

A D5 animal exiting its house, recorded at 600 fps (plays at 15 fps). The house was made visible by adding a few drops of milk to the seawater. The feeding funnels can be seen because they are clogged with algae, which is the likely stimulus to exit the house.

**Supplementary video 10.** Alternating bending and swimming in D5 isolated tails.

Two isolated tails from D5 animals, recorded at 700fps (plays at 15 fps), displaying the two movement types made by isolated tails: swimming (upper tail) and alternating bending (lower tail).
